# Supplementary material
Source: publisher figshare collection journal article supplement (https://acs.figshare.com/ndownloader/files/4260358)
Supplement: Supplementary file 1 [file 4260358]

**Model fitting for squalene content and yield.** Experimental results for SQC, SQY and ERGC were analyzed by ANOVA (data in **Tables I** and **II** provided as supporting information) to test the validity of each model and to determine whether a more complex one would have a better fit. If the  $F$  test for the model is significant at the 5% level ( $p < 0.05$ ), then the model can adequately account for the variation observed. If the  $F$  test for lack of fit is significant, then a more complicated model is needed. The full second-order polynomial model (Eq [1]) was fitted for the case of SQC and ERGC responses; since all of the factors have  $p < 0.05$  (see **Table 4** of the manuscript and also **Tables I** and **II** provided as supporting information). In the case of SQY response, the full second-order model was reduced by omitting the insignificant terms  $X_2^2$  and the interactions  $X_1X_2$ ,  $X_1X_3$ ,  $X_2X_3$  ( $p > 0.05$ ). Although  $X_1$  appeared to have no significant linear effect to SQY, it was included in Eq [4] as its quadratic effect was significant at the 5% level (in the same tables). The models 1-3 fitted for ANOVA were found to be adequate and without significant lack of fit ( $p >> 0.05$ ). Also, the coefficient of determination ( $R^2$ ) values (0.939 - 0.976) (**Table I**) indicate a high degree of correlation between the observed and the predicted responses. Consequently, the above models can give an adequate description of the experimental data and are suitable for use in the optimization process.

**Main effects of factors and interactions on SQC, SQY and ERGC responses.** Eqs [2] and [4] describe the significant linear effects of the factors ( $X_1$ ,  $X_2$ ,  $X_3$ ) tested to SQC and SQY. It is apparent from these equations that  $X_1$  and  $X_3$  possess significant positive effects to both SQC and SQY, indicative of a proportional relationship between these factors (terbinafine and time) and responses. The negative coefficients associated with the quadratic term for  $X_1$  and  $X_3$  in Eqs [2] and [4] indicate that SQC and SQY decrease

when these factors approach their set maximum (+1) levels (see Experimental Design). On the other hand,  $X_2$  affected negatively SQC and SQY. Moreover, a positive quadratic effect was noted for  $X_2$  to SQC, while its quadratic effect to SQY was insignificant ( $p > 0.05$ ). The significant negative interaction between  $X_1$  and  $X_2$  suggests an antagonistic behaviour that affects negatively SQC, while the positive interactions between  $X_1$  and  $X_3$  and also between  $X_2$  and  $X_3$  indicate synergism. No significant interactions were assigned to all pairs of factors regarding SQY. Coefficients estimates for model 3 and the corresponding  $p$  values (Eq 6, **Table I** of the supporting information) show that the two regulators  $X_1$  and  $X_2$  affect in an opposite way ergosterol accumulation. Thus, terbinafine enhances squalene content at the expense of ergosterol, whereas the opposite trend was found for the activity of the other regulator.

**Table I.** Analysis of variance of SQC, SQY and ERGC obtained using the RSM model.

| Source                                               | F value <sup>a</sup> | p value |
|------------------------------------------------------|----------------------|---------|
| <b>SQC response (<math>R^2</math>-adj. = 0.976)</b>  |                      |         |
| Regression                                           | 45.31                | 0.000   |
| Linear                                               | 42.31                | 0.000   |
| Square                                               | 71.76                | 0.000   |
| Interaction                                          | 21.86                | 0.000   |
| Lack of fit                                          | 2.86                 | 0.136   |
| <b>SQY response (<math>R^2</math>-adj. = 0.939)</b>  |                      |         |
| Regression                                           | 17.22                | 0.000   |
| Linear                                               | 35.32                | 0.000   |
| Square                                               | 15.57                | 0.000   |
| Interaction                                          | 0.77                 | 0.536   |
| Lack of fit                                          | 1.27                 | 0.401   |
| <b>ERGC response (<math>R^2</math>-adj. = 0.973)</b> |                      |         |
| Regression                                           | 40.32                | 0.000   |
| Linear                                               | 64.67                | 0.000   |
| Square                                               | 21.85                | 0.000   |
| Interaction                                          | 34.44                | 0.000   |
| Lack of fit                                          | 0.65                 | 0.677   |

<sup>a</sup>F-test values are significant at the 5% level

**Table II.** Estimated regression coefficients and significance ( $p$  values) for SQC, SQY and ERGC after analysis using coded values of factors.

| Term                                         | Coefficient | $p$ value |
|----------------------------------------------|-------------|-----------|
| <b>SQC response</b>                          |             |           |
| Constant                                     | 6.2375      | 0.000     |
| Terbinafine                                  | 0.6123      | 0.000     |
| Methyl jasmonate                             | -0.7939     | 0.000     |
| Fermentation time                            | 0.3615      | 0.003     |
| Terbinafine $\times$ Terbinafine             | -0.8386     | 0.000     |
| Methyl jasmonate $\times$ Methyl jasmonate   | 0.7046      | 0.000     |
| Fermentation time $\times$ Fermentation time | -0.7096     | 0.000     |
| Terbinafine $\times$ Methyl jasmonate        | -0.7987     | 0.000     |
| Terbinafine $\times$ Fermentation time       | 0.3537      | 0.017     |
| Methyl jasmonate $\times$ Fermentation time  | 0.4887      | 0.003     |
| <b>SQY response</b>                          |             |           |
| Constant                                     | 16.848      | 0.000     |
| Terbinafine                                  | 0.086       | 0.886     |
| Methyl jasmonate                             | -3.710      | 0.000     |
| Fermentation time                            | 4.721       | 0.000     |
| Terbinafine $\times$ Terbinafine             | -2.701      | 0.001     |
| Methyl jasmonate $\times$ Methyl jasmonate   | -0.265      | 0.650     |
| Fermentation time $\times$ Fermentation time | -3.028      | 0.000     |
| Terbinafine $\times$ Methyl jasmonate        | -1.062      | 0.193     |
| Terbinafine $\times$ Fermentation time       | 0.312       | 0.690     |
| Methyl jasmonate $\times$ Fermentation time  | -0.343      | 0.663     |

| <b>ERGC response</b>                  |         |       |
|---------------------------------------|---------|-------|
| Constant                              | 2.0200  | 0.000 |
| Terbinafine                           | -0.3532 | 0.000 |
| Methyl jasmonate                      | 0.0781  | 0.024 |
| Fermentation time                     | 0.1941  | 0.000 |
| Terbinafine × Terbinafine             | 0.1062  | 0.004 |
| Methyl jasmonate × Methyl jasmonate   | -0.0777 | 0.022 |
| Fermentation time × Fermentation time | 0.1875  | 0.000 |
| Terbinafine × Methyl jasmonate        | 0.2688  | 0.000 |
| Terbinafine × Fermentation time       | -0.2563 | 0.000 |
| Methyl jasmonate × Fermentation time  | -0.1237 | 0.009 |
